# Supplementary material for: Exploring correlation effects and volume collapse during electride dimensionality change in Ca2N
Source: Royal Society of Chemistry journal article supplement (doi:10.1039/d3cp04472f), 2023-01-01
Supplement: d3cp04472f1.pdf [file d3cp04472f1.pdf]

# Supplementary Information: Exploring Correlation Effects and Volume Collapse During 1D-0D Electride Subspace Reduction in $\text{Ca}_2\text{N}$

Dmitry Y. Novoselov,<sup>\*,†,‡,¶</sup> Mary A. Mazannikova,<sup>†,‡,¶</sup> Dmitry M. Korotin,<sup>†,‡</sup>  
Alexey O. Shorikov,<sup>†,‡,¶</sup> Vladimir I. Anisimov,<sup>†,‡,¶</sup> and Artem R. Oganov<sup>‡</sup>

<sup>†</sup>*M.N. Mikheev Institute of Metal Physics of Ural Branch of Russian Academy of Sciences,  
18 S. Kovalevskaya St., Yekaterinburg, 620108, Russia*

<sup>‡</sup>*Skolkovo Institute of Science and Technology, 3 Nobel St., Moscow, 143026, Russia*

<sup>¶</sup>*Department of theoretical physics and applied mathematics, Ural Federal University, 19  
Mira St., Yekaterinburg, 620002, Russia*

E-mail: [novoselov@imp.uran.ru](mailto:novoselov@imp.uran.ru)

**Table 1: Lattice parameters for Ca<sub>2</sub>N taken from Ref.<sup>1</sup>**

| Symmetry group | Lattice parameter (Å) | Atom | Wykoff position | x      | y      | z      |
|----------------|-----------------------|------|-----------------|--------|--------|--------|
| $Fd\bar{3}m$   | a = 9.69              | Ca   | 32e             | 0.6155 | 0.3845 | 0.6155 |
|                |                       | N    | 16d             | 0.1250 | 0.1250 | 0.6250 |
| $I\bar{4}2d$   | a = 7.12              | Ca   | 16e             | 0.3114 | 0.5658 | 0.6806 |
|                | c = 7.23              | N    | 8d              | 0.7500 | 0.1314 | 0.8750 |

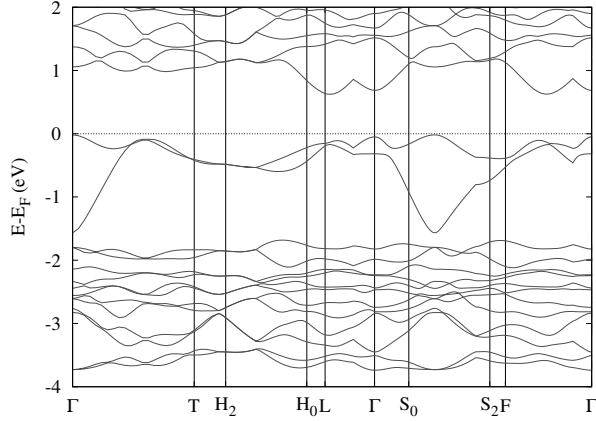

Figure 1: Band structure of  $I\bar{4}2d$  phase of Ca<sub>2</sub>N.

## References

- (1) Tang, H.; Wan, B.; Gao, B.; Muraba, Y.; Qin, Q.; Yan, B.; Chen, P.; Hu, Q.; Zhang, D.; Wu, L. et al. Metal-to-Semiconductor Transition and Electronic Dimensionality Reduction of Ca<sub>2</sub>N Electride under Pressure. *Advanced Science* **2018**, *5*, 2–7.
